# Supplementary material
Source: MDPI journal article supplement (https://www.mdpi.com/2227-9717/11/6/1731)
Supplement: s1 [file s1]

## Supplementary Materials for:

*Article*

# Crude Glycerol Hydrogenolysis to Bio-Propylene Glycol: Effect of Its Impurities on Activity, Selectivity and Stability

Martín N. Gatti <sup>1,2</sup>, Francisco Pompeo <sup>1,2</sup>, Nora N. Nichio <sup>1,2</sup>, Gerardo F. Santori <sup>1,2,\*</sup>

<sup>1</sup> Centro de Investigación y Desarrollo en Ciencias Aplicadas (CINDECA), Facultad de Ciencias Exactas, Universidad Nacional de La Plata (UNLP)-CONICET, Calle 47, 257, La Plata 1900, Argentina; martin.gatti@ing.unlp.edu.ar (M.N.G.); fpompeo@quimica.unlp.edu.ar (F.P.); nnichio@quimica.unlp.edu.ar (N.N.N)

<sup>2</sup> Facultad de Ingeniería, Universidad Nacional de La Plata (UNLP), Calle 1 esq. 47, La Plata 1900, Argentina

\* Correspondence: santori@quimica.unlp.edu.ar

## Supplementary Material S1

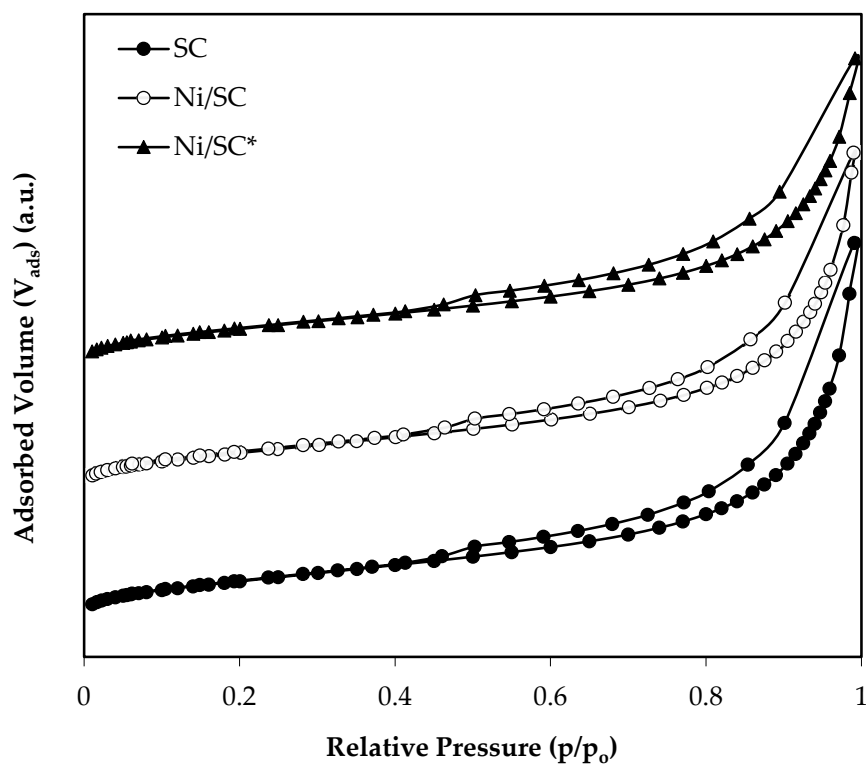

**Figure S1.** N<sub>2</sub> adsorption-desorption isotherms of SC (●), Ni/SC (○) and Ni/SC\* (▲).

## Supplementary Material S2

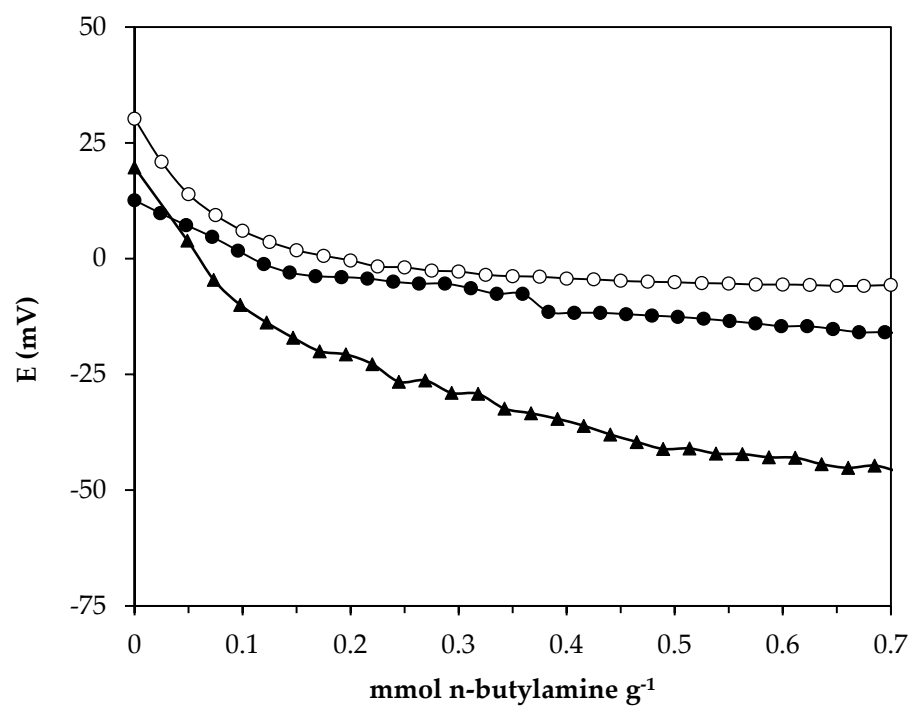

**Figure S2.** Potentiometric titration curves with n-butylamine in acetonitrile of SC (●), Ni/SC (○) and Ni/SC\* (▲).

Supplementary Material S3

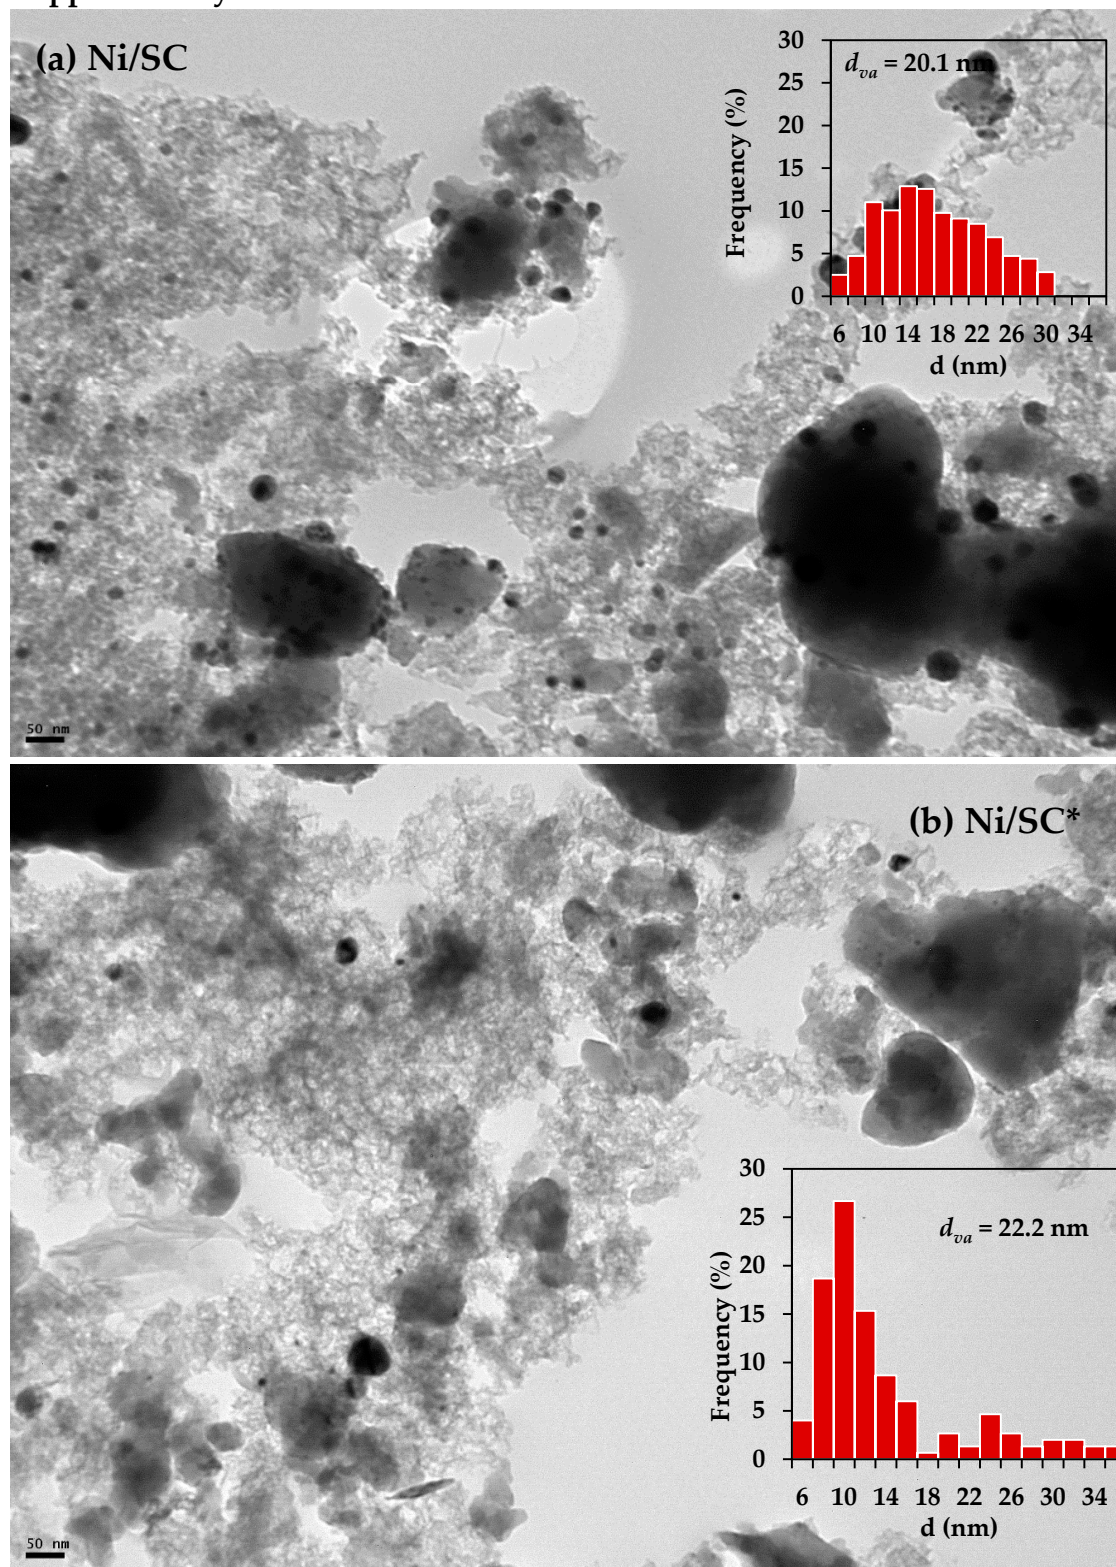

Figure S3. TEM micrographs for the reduced catalysts (a) fresh Ni/SC (b) used Ni/SC\*

## Supplementary Material S4

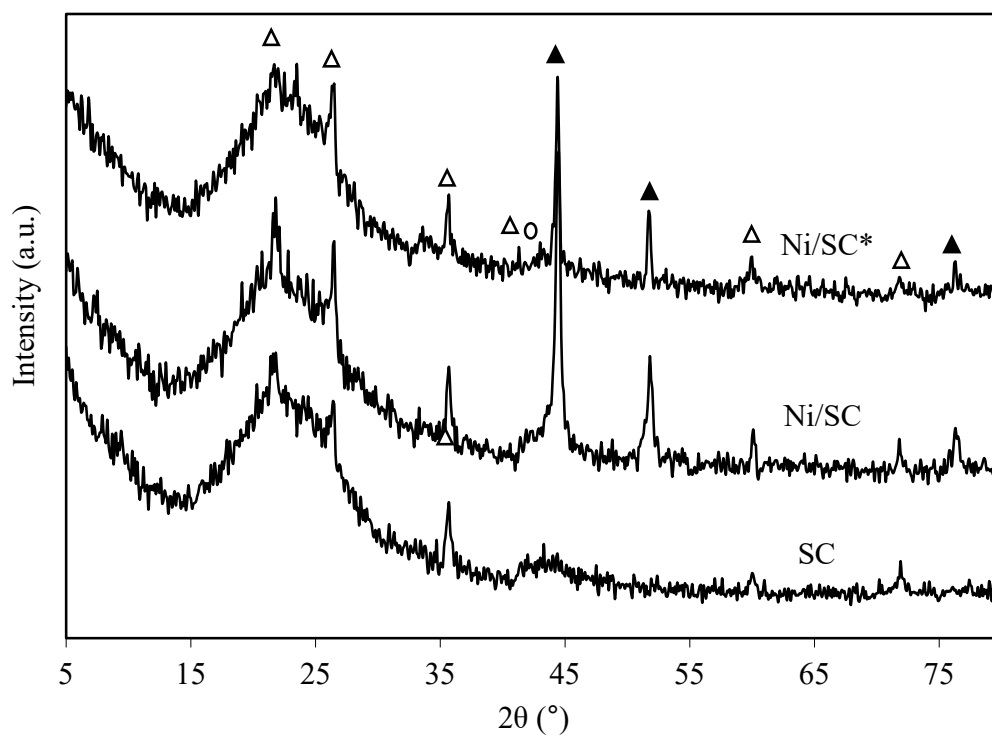

**Figure S4.** XRD patterns of SC, Ni/SC reduced fresh catalyst and used Ni/SC\* catalyst. Symbols are referred to metallic nickel (▲), silicon carbide (Δ) and graphitic carbon (○).

## Supplementary Material S5

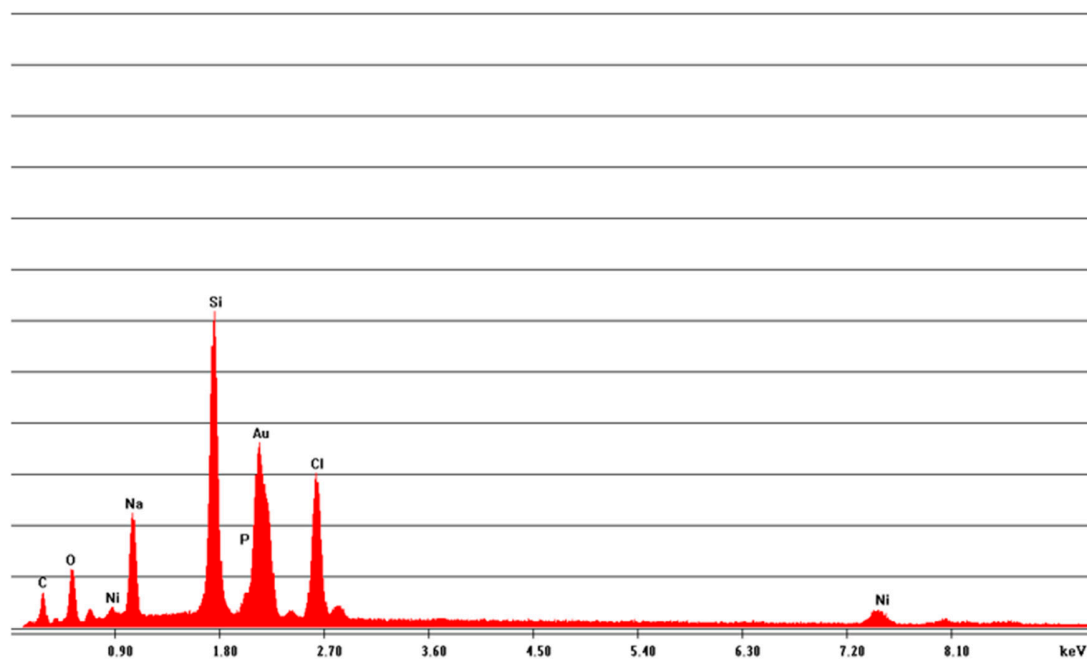

**Figure S5.** Analysis of elements by SEM-EDAX for the used catalyst after three reaction cycles in the presence of the crude glycerol sample D. Reaction conditions: 30 wt.% aqueous glycerol solution, 260 °C, 2 MPa, 2 h,  $m_c/m_{gly} = 0.24$  (mass ratio).

## Supplementary Material S6

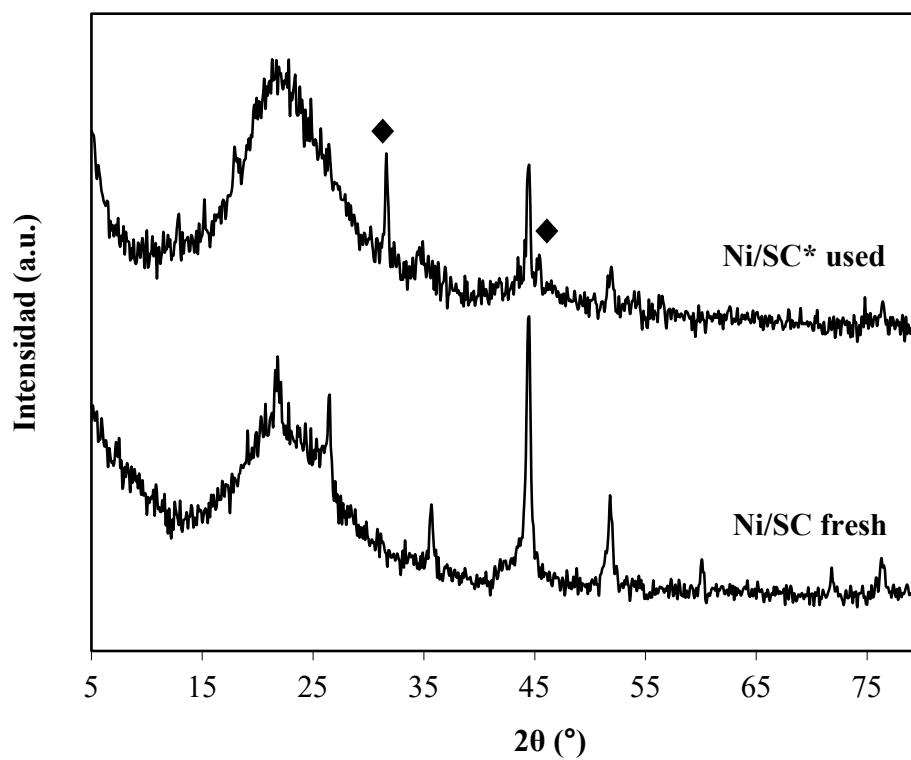

**Figure S6.** XRD patterns of Ni/SC reduced fresh catalyst and used Ni/SC\* catalyst. Symbols are referred to planes (2 0 0) at  $31.69^{\circ}$  and (2 2 0) at  $45.45^{\circ}$  of crystalline cubic NaCl (♦) (JCPDS 05-0628).

## Supplementary Material S7

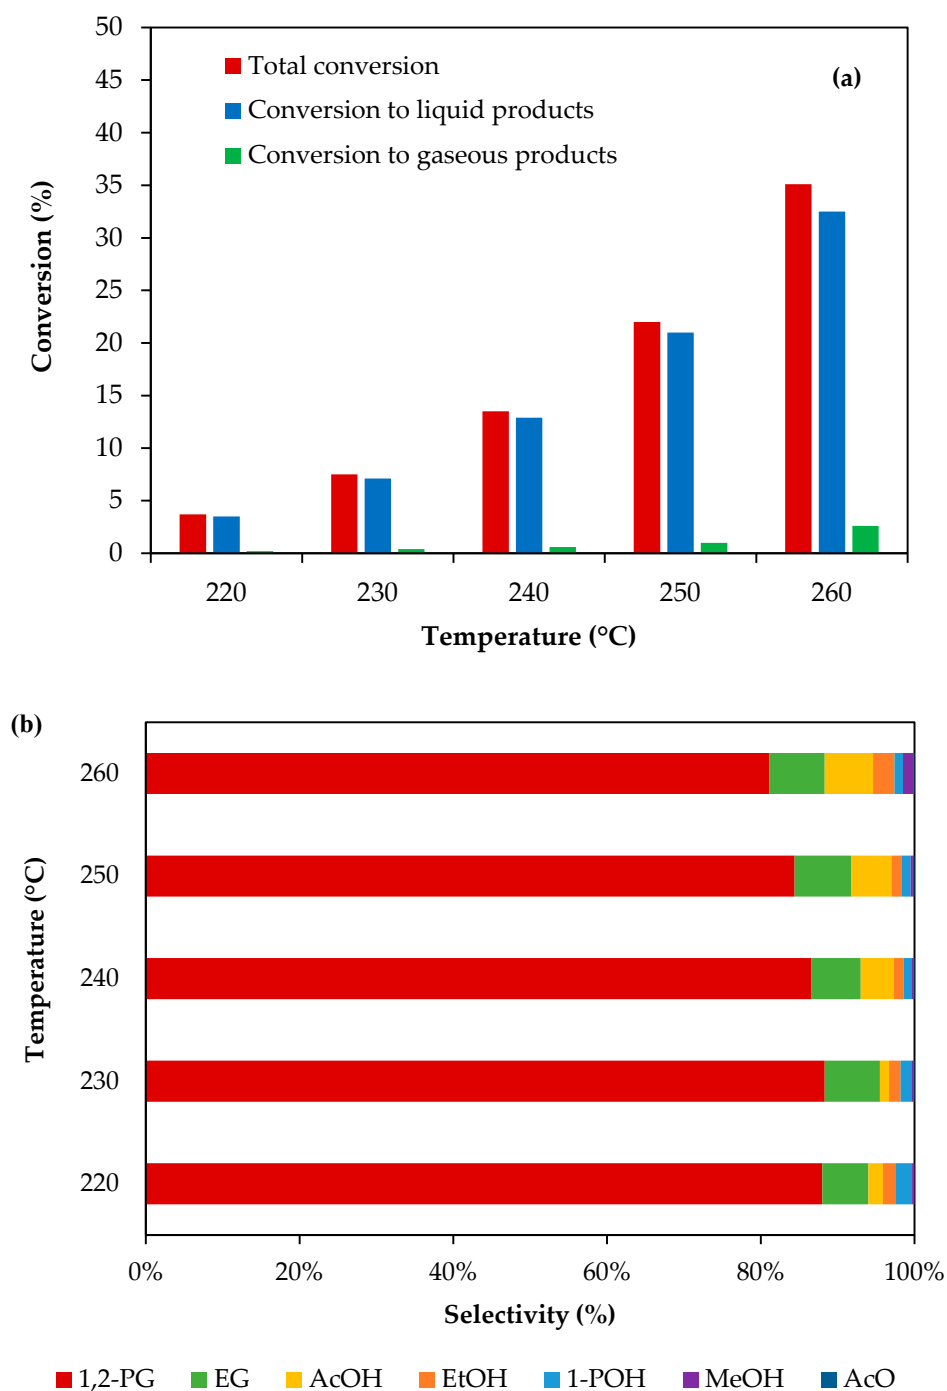

**Figure S7.** (a) Glycerol conversion vs temperature (b) Selectivity to liquid products vs temperature. Reaction conditions: 30 wt.% aqueous glycerol solution, 2 h, 2 MPa H<sub>2</sub>, m<sub>c</sub>/m<sub>gly</sub> = 0.24 (mass ratio).



## Supplementary Material S8

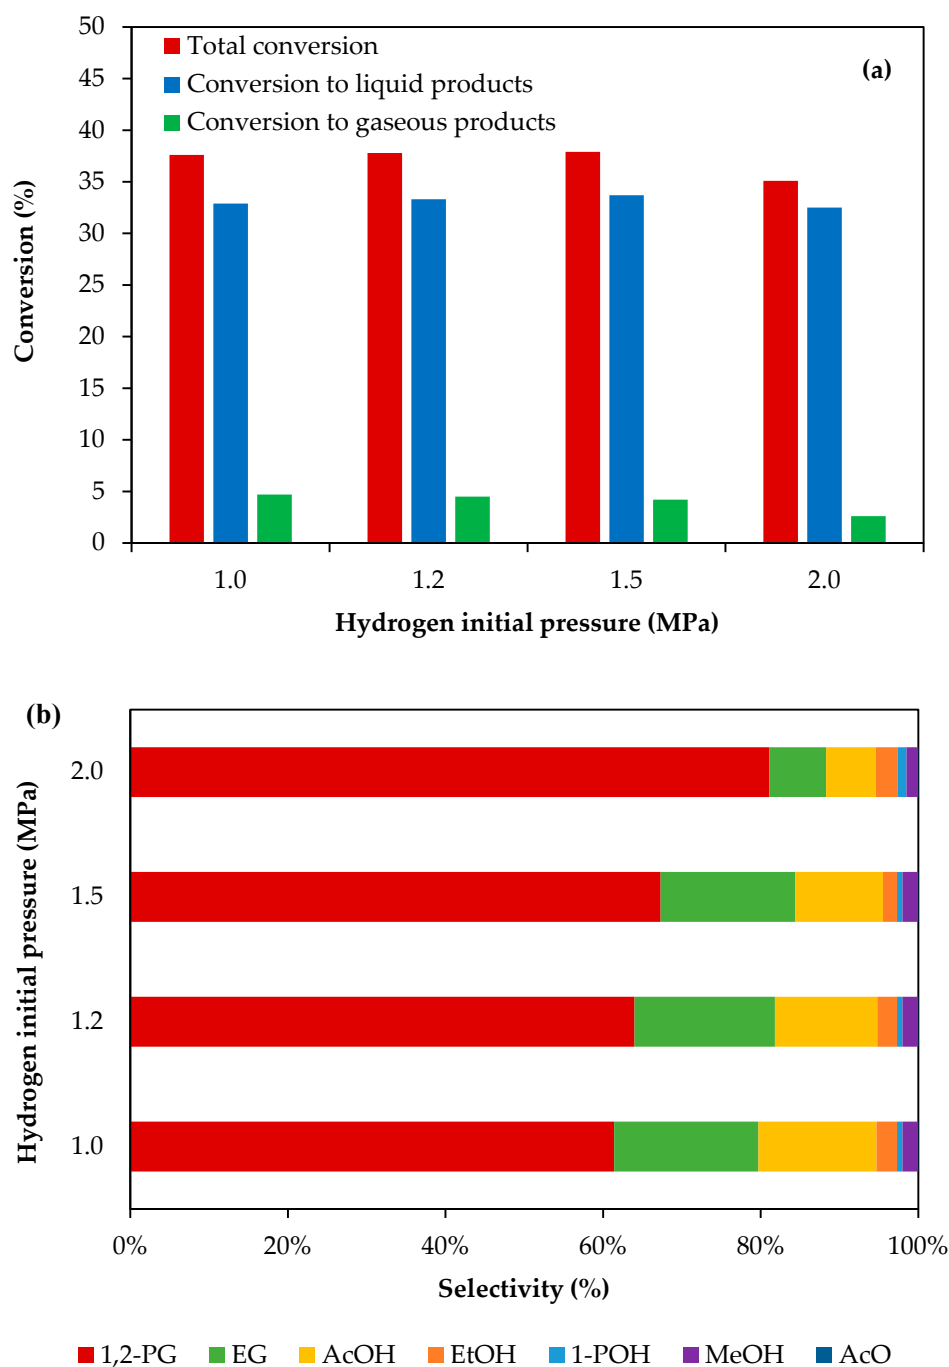

**Figure S8.** (a) Glycerol conversion vs partial pressure of  $H_2$  (b) Selectivity to liquid products vs partial pressure of  $H_2$ . Reaction conditions: 30 wt.% aqueous glycerol solution, 260 °C, 2 h,  $m_c/m_{gly} = 0.24$  (mass ratio).

## Supplementary Material S9

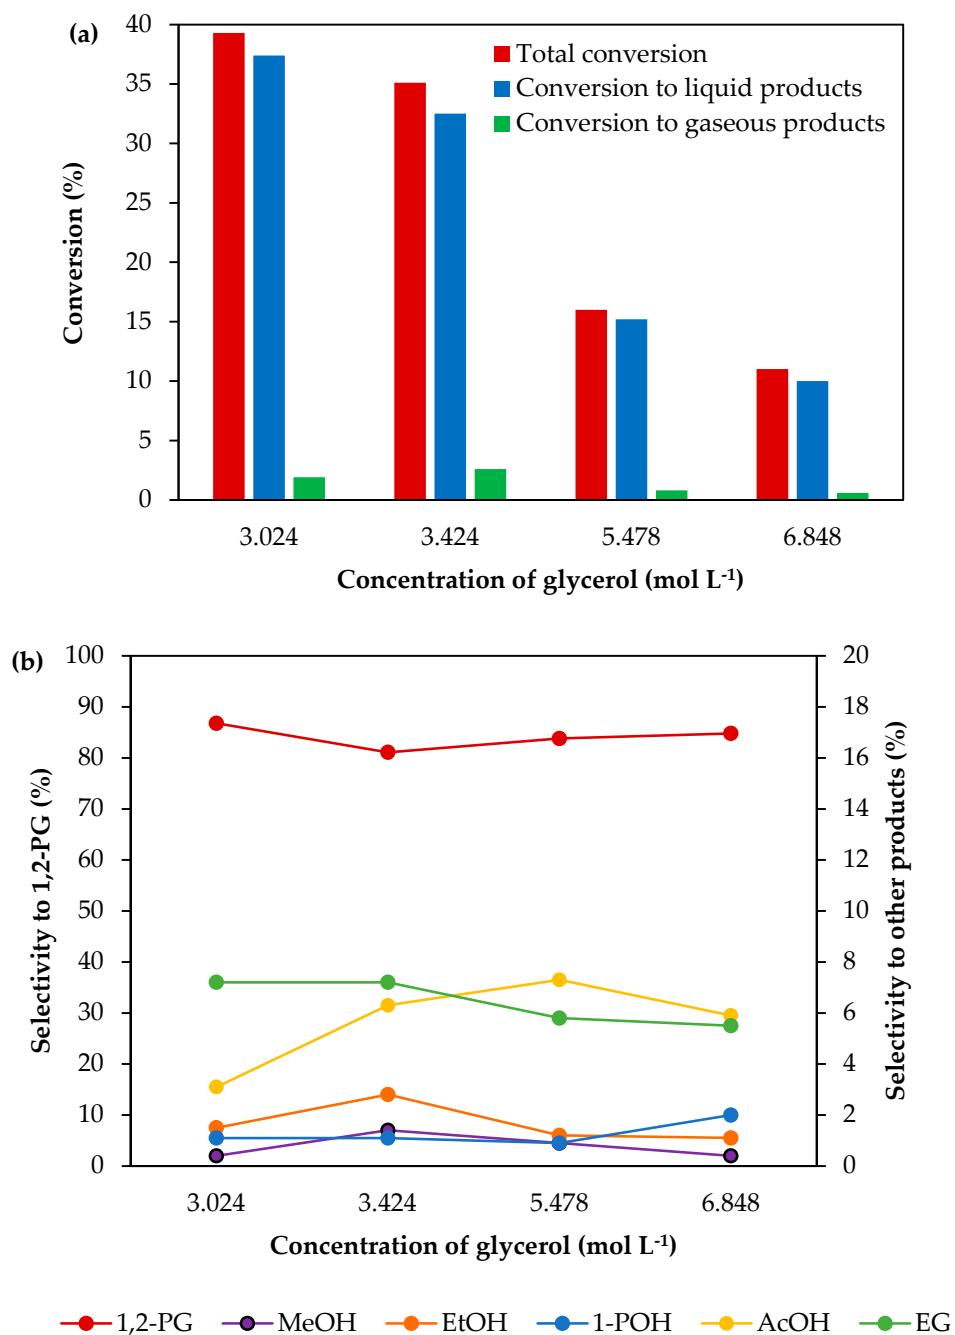

**Figure S9.** (a) Glycerol conversion vs glycerol initial concentration (b) Selectivity to liquid products vs initial glycerol concentration. Reaction conditions: 30-80 wt.% aqueous glycerol solutions, 260 °C, 2 MPa de H<sub>2</sub>, 2 h, m<sub>c</sub>/m<sub>gly</sub> = 0.08-0.24 (mass ratio).

# Supplementary Material S10

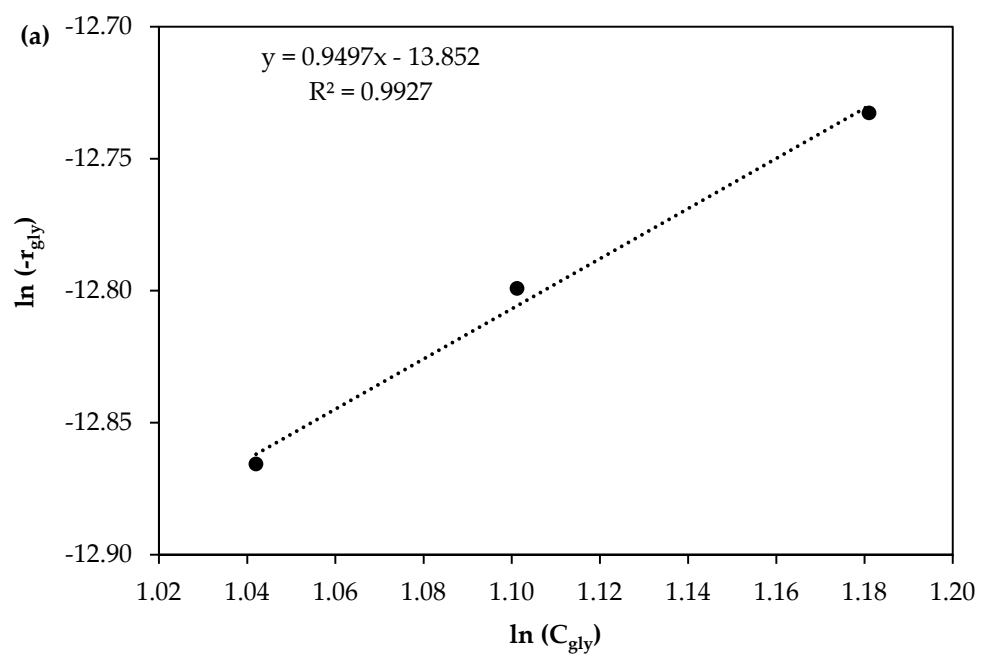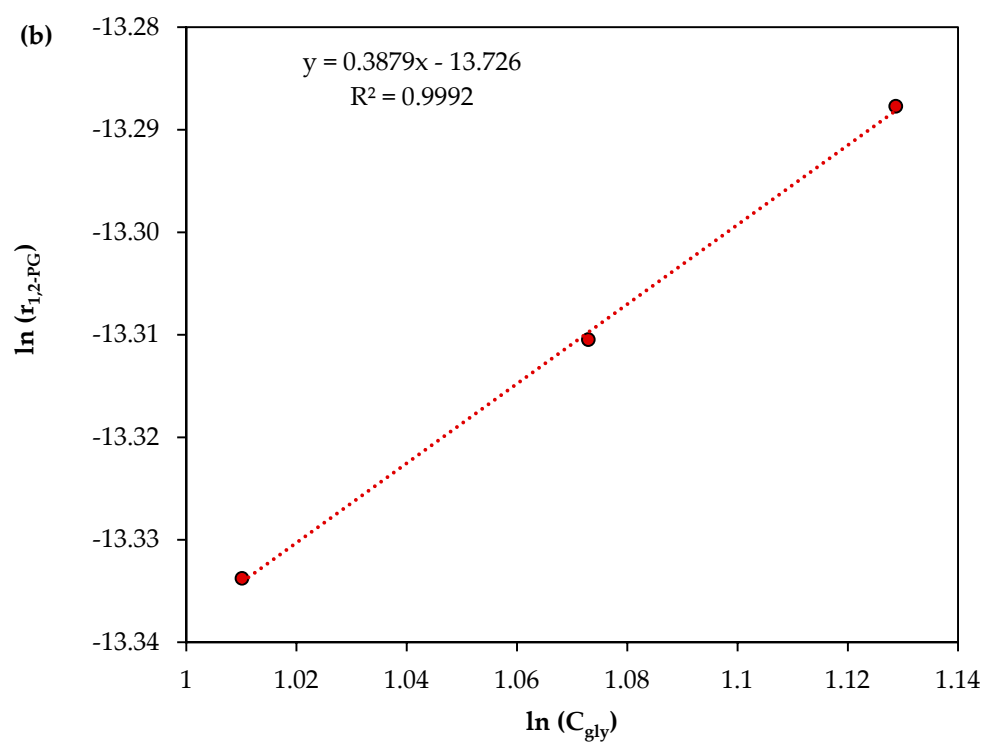

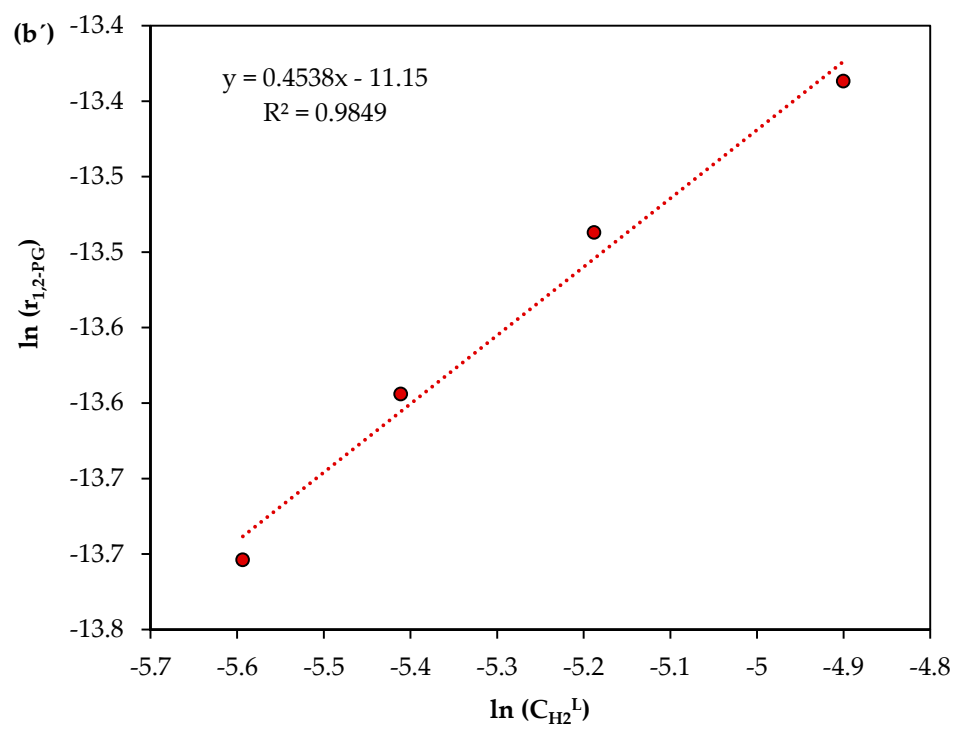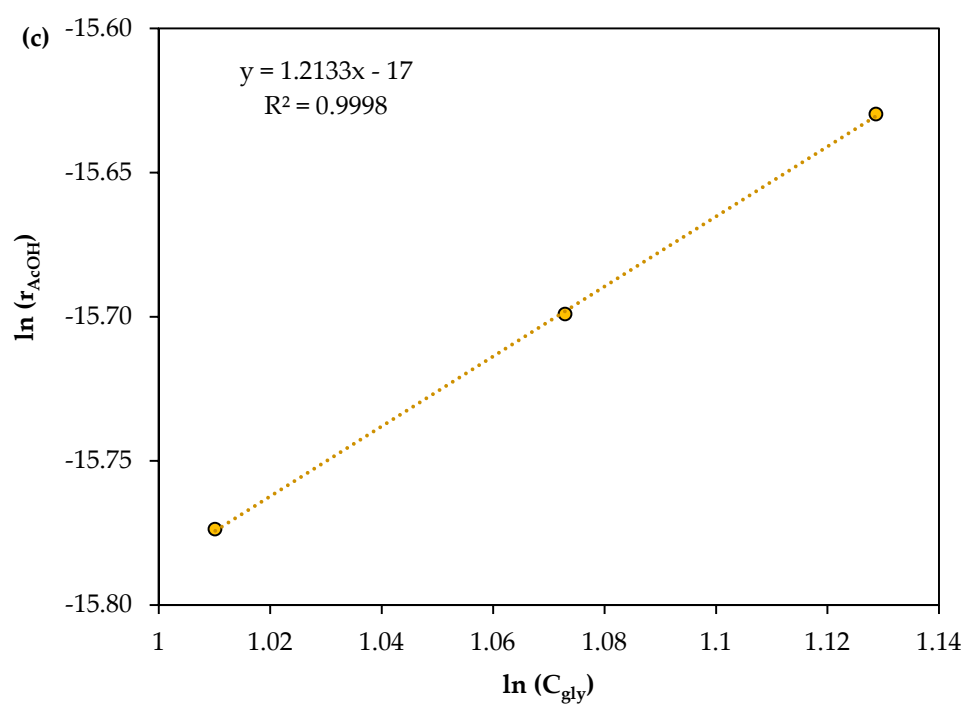

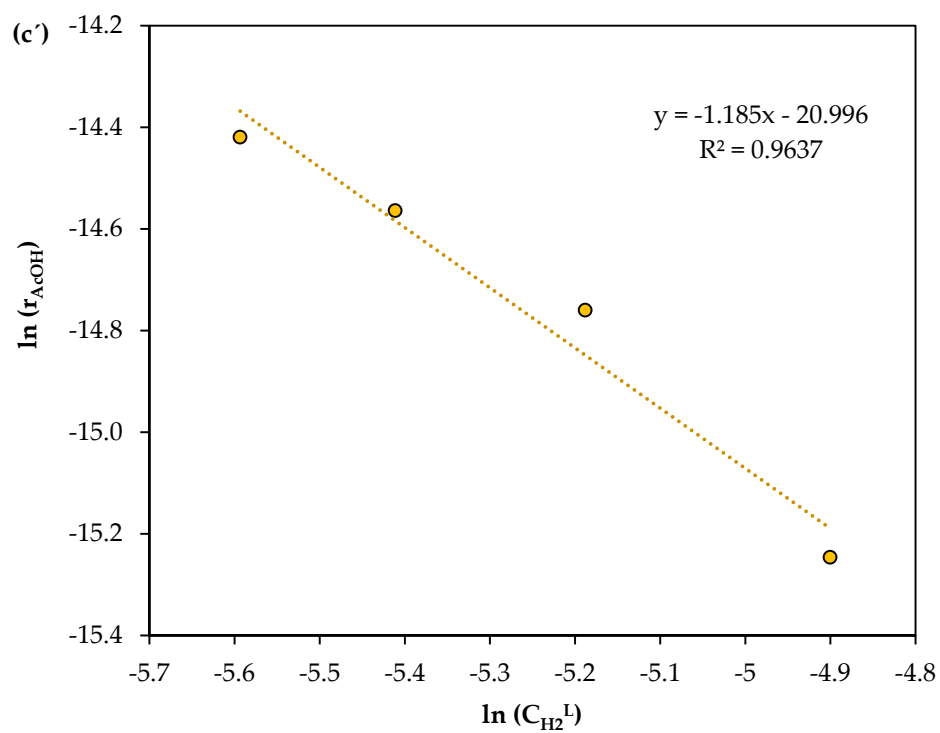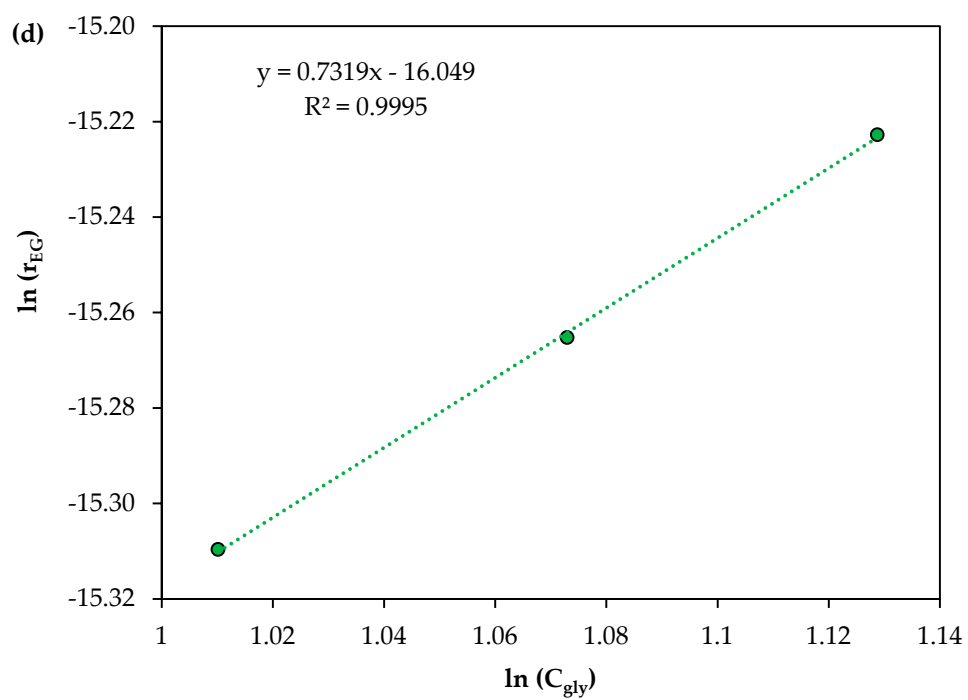

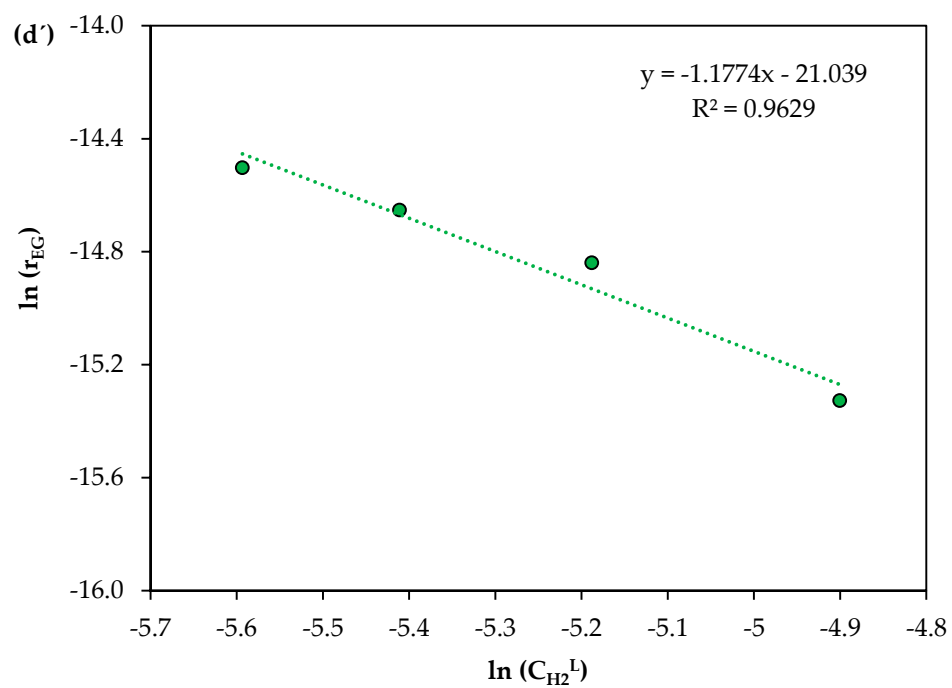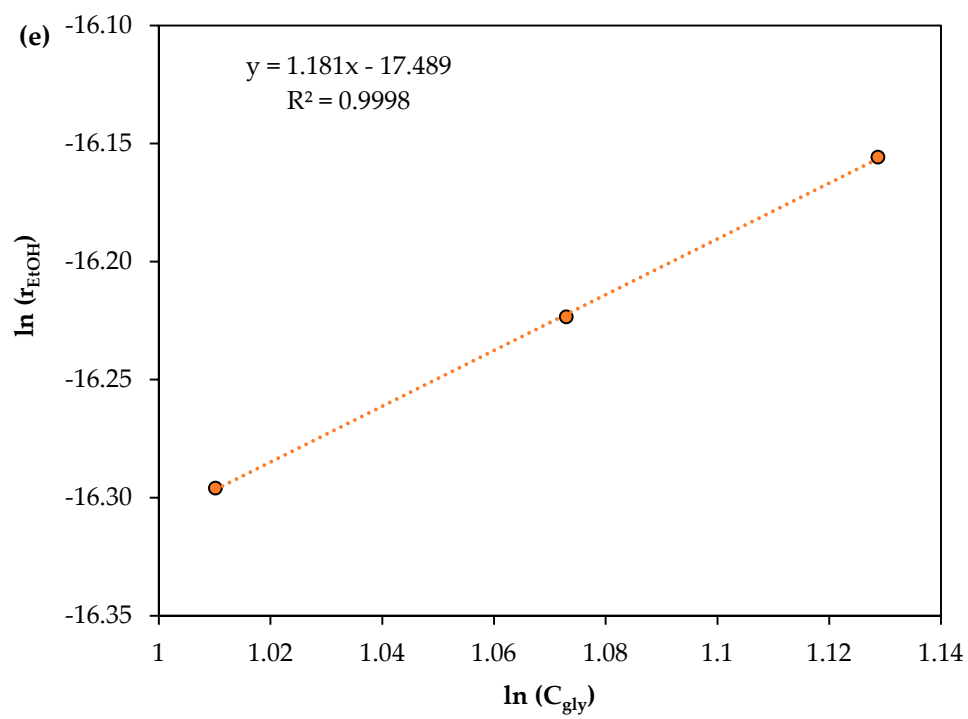

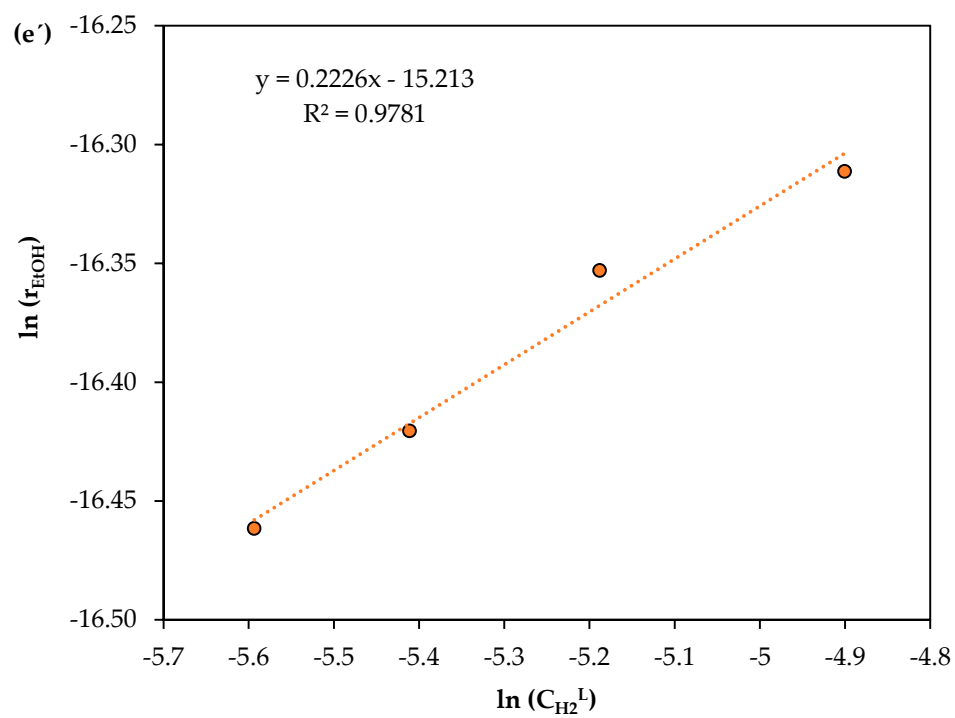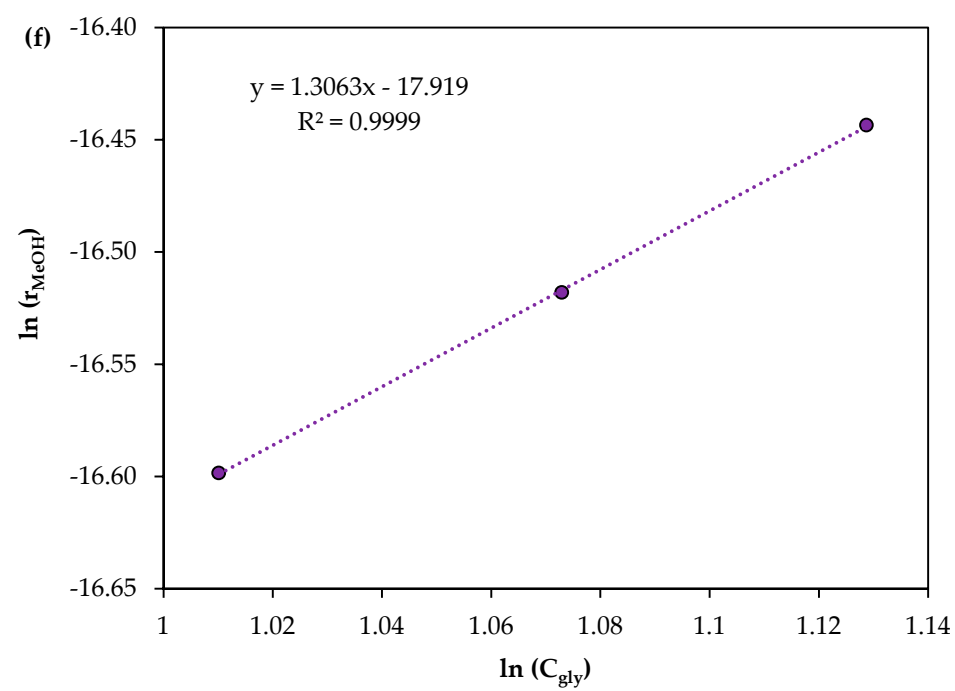

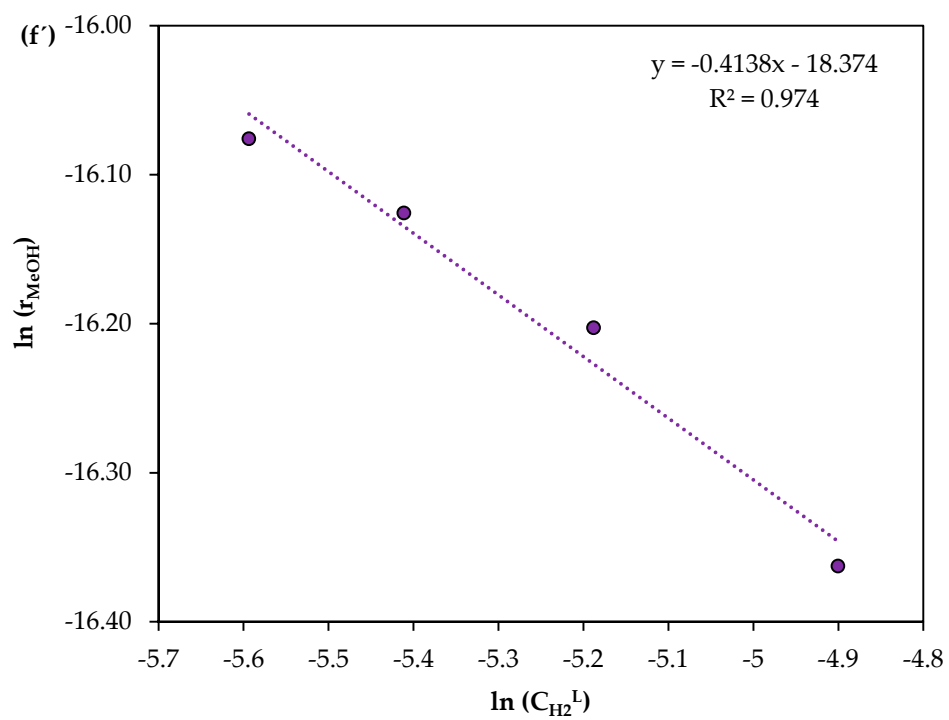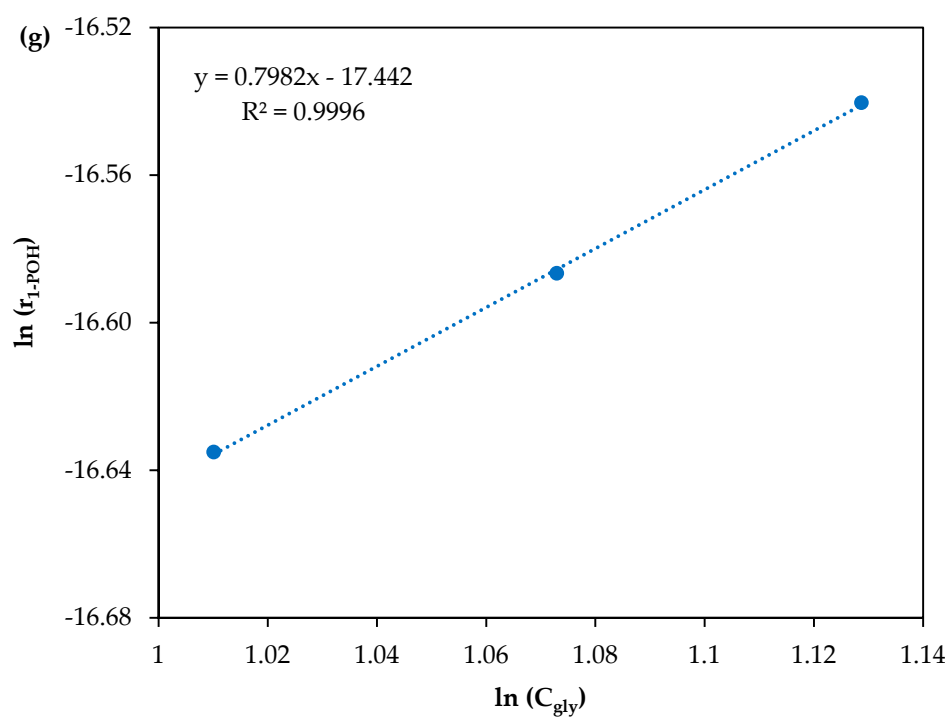



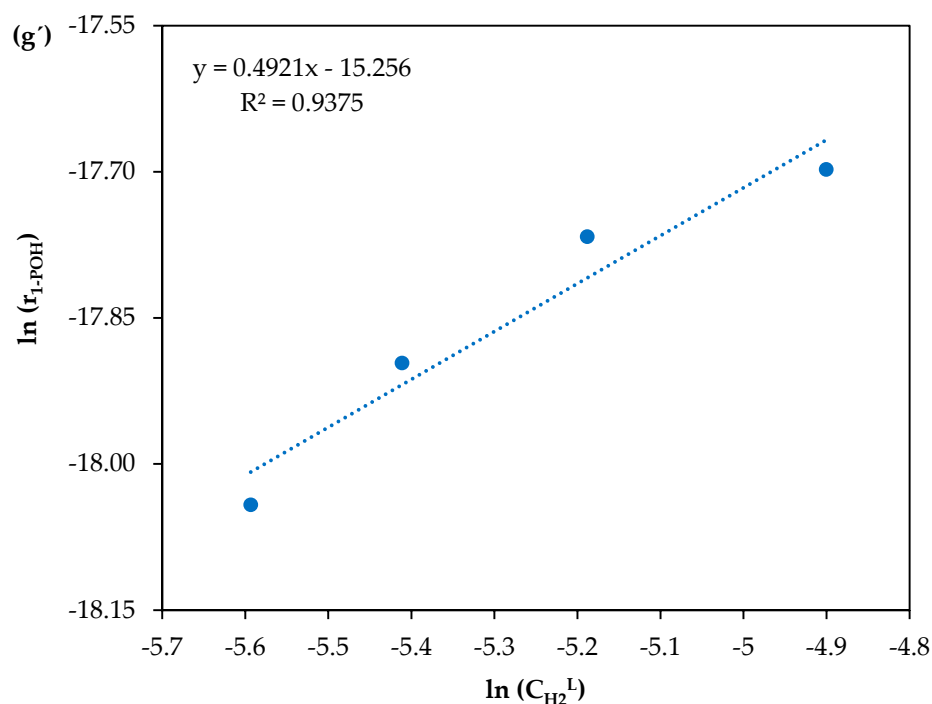

**Figure S10.** Fitting of experimental data by linear regression to obtain the reaction orders with respect to glycerol and hydrogen for **(a)** Gly **(b, b')** 1,2-PG **(c, c')** AcOH **(d, d')** EG **(e, e')** MeOH **(f, f')** EtOH **(g, g')** 1-POH. Reaction conditions: 30 wt.% aqueous glycerol solution, 260 °C, 1-2 MPa  $H_2$ , 0.5-1 h,  $m_c/m_{gly} = 0.24$  (mass ratio).

## Supplementary Material S11

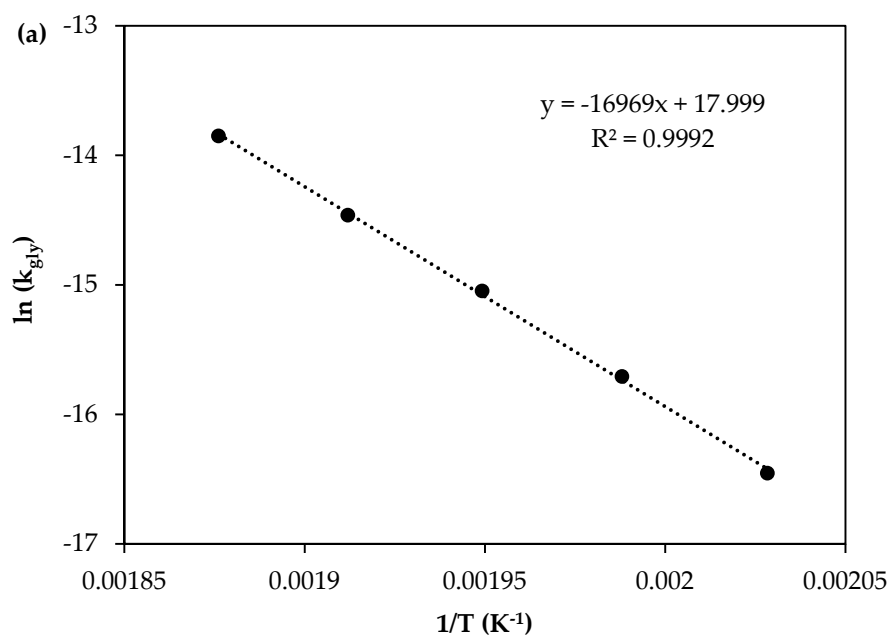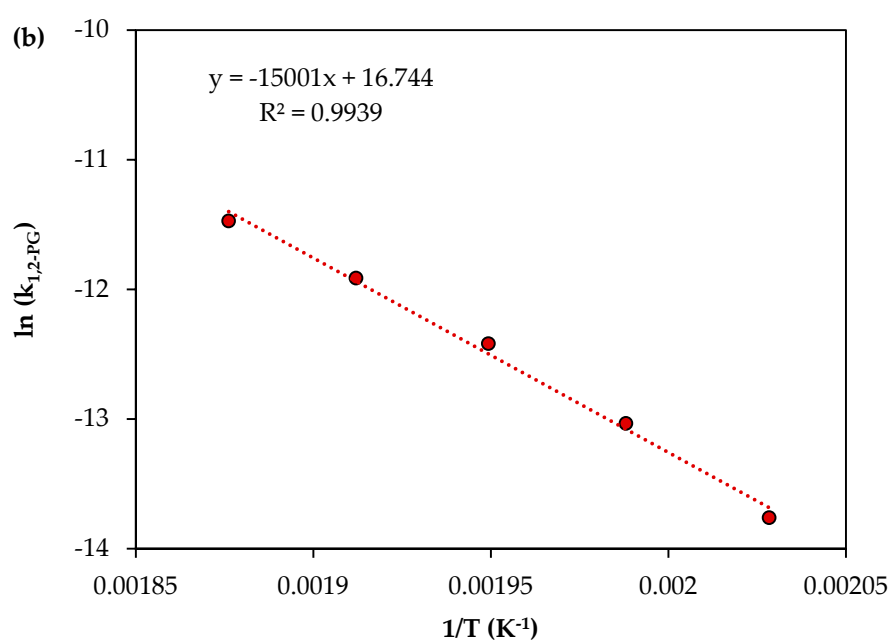

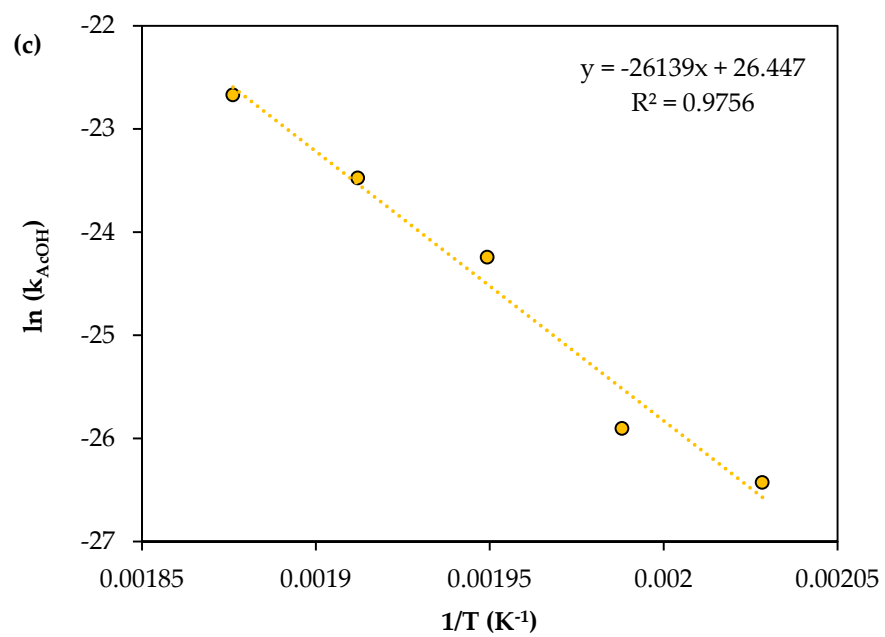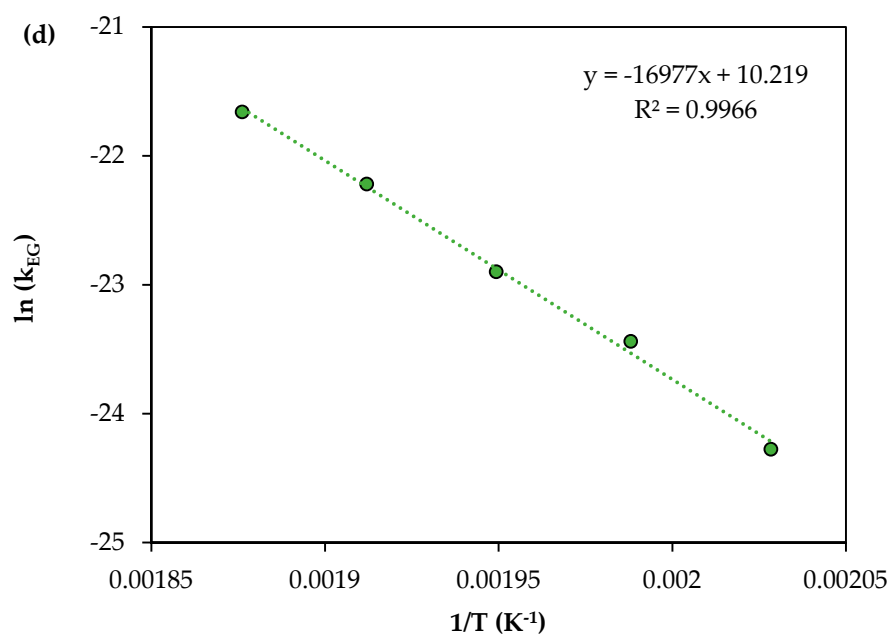

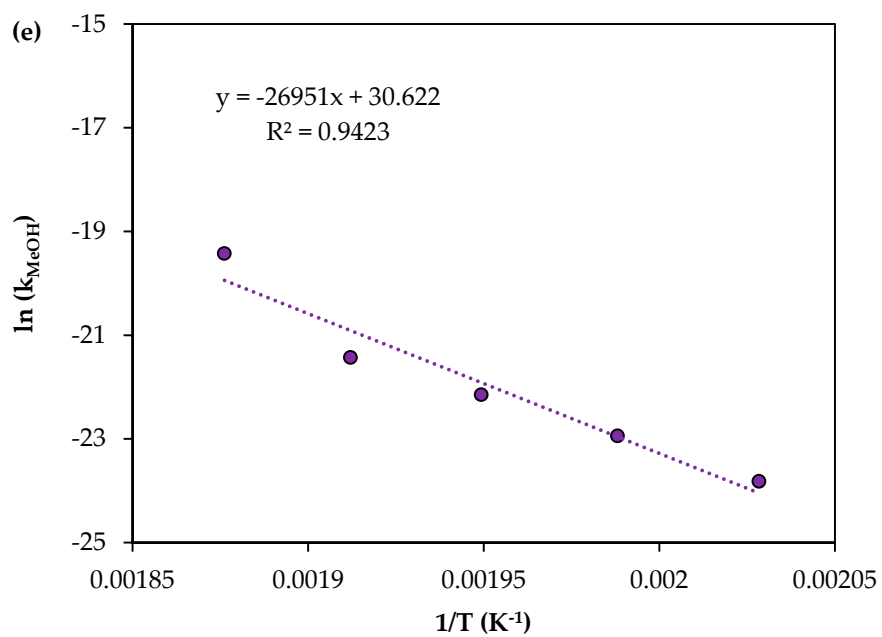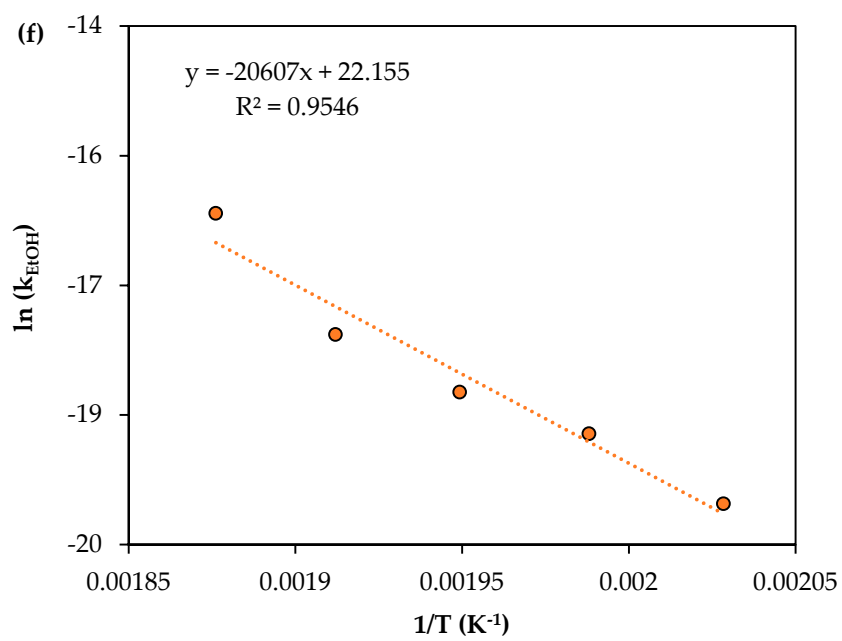

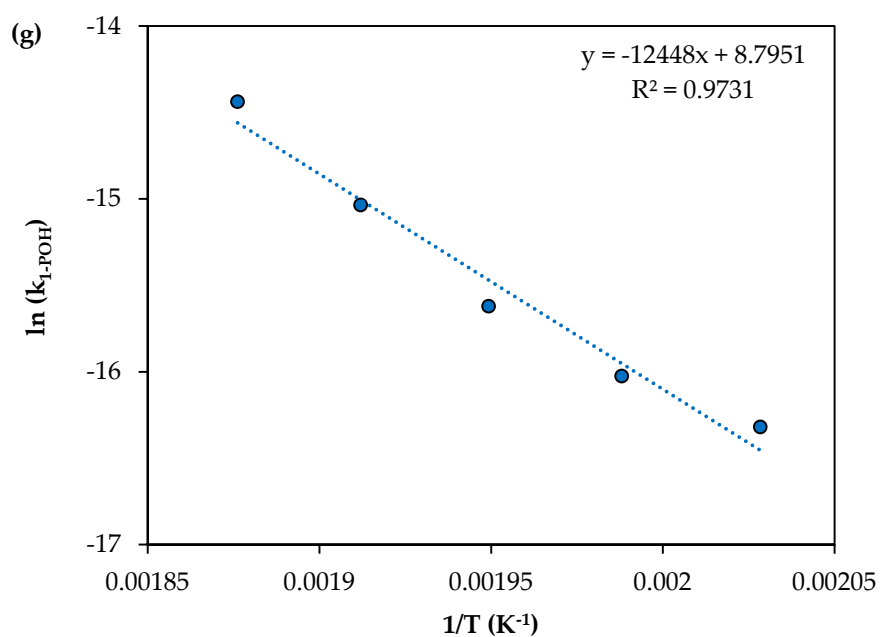

**Figure S11.** Fitting of experimental data by linear regression to obtain  $\ln(k_{oj})$  y  $E_{aj}$  **(a)** Gly **(b)** 1,2-PG **(c)** AcOH **(d)** EG **(e)** MeOH **(f)** EtOH **(g)** 1-POH. Reaction conditions: 30 wt.% aqueous glycerol solution, 220-260 °C, 2 MPa  $H_2$ , 2 h,  $m_c/m_{gly} = 0.24$  (mass ratio).

## Supplementary Material S12

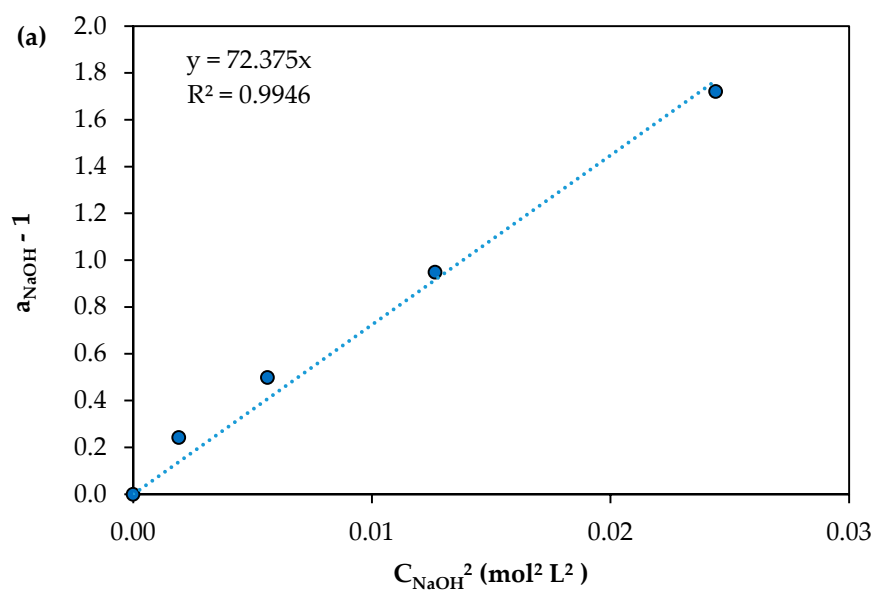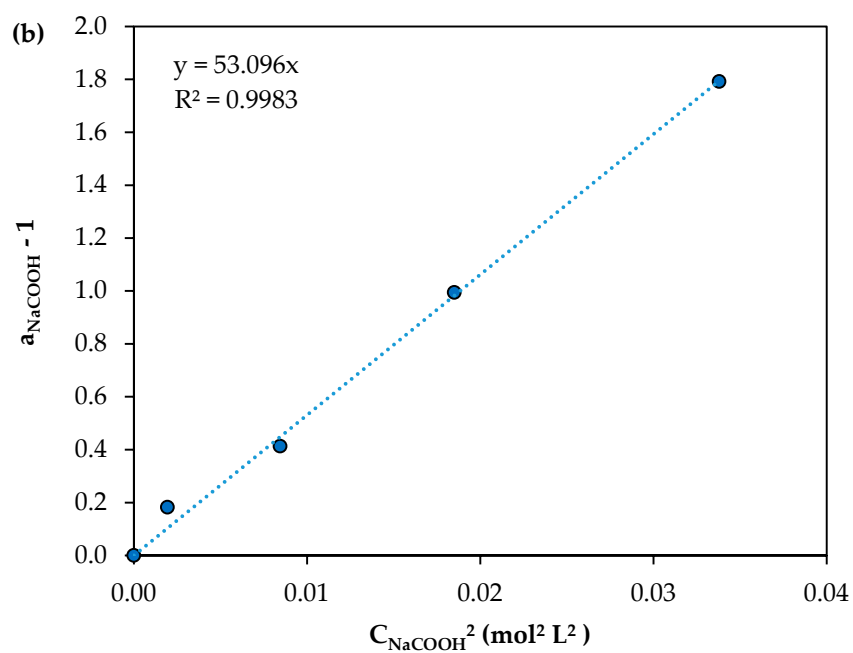

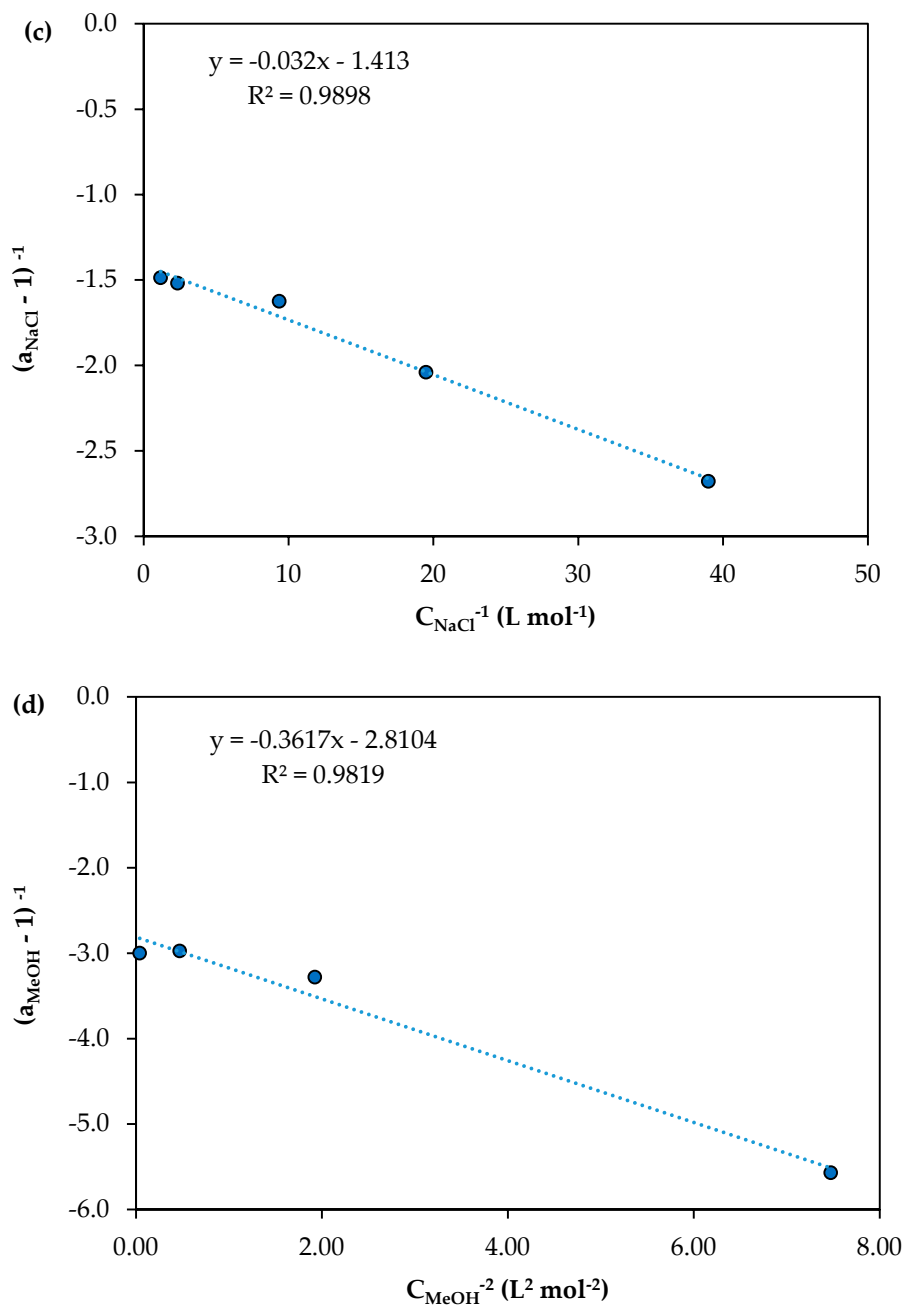

**Figure S12.** Fitting of experimental data by linear regression to obtain the individual activity factors ( $a_i$ ) for (a) NaOH (b) NaCOOH (c) NaCl (d) MeOH. Reaction conditions: 30 wt.% aqueous glycerol solution, 260 °C, 2 MPa  $\text{H}_2$ , 2 h,  $m_c/m_{\text{gly}} = 0.24$  (mass ratio).
